# Supplementary material for: Stability and Strength of Monolayer Polymeric C60
Source: PubMed Central journal article supplement (PMC9881160; doi:10.1021/acs.nanolett.2c04497), 2023-01-11
Supplement: nl2c04497_si_001.pdf [file nl2c04497_si_001.pdf]

**Supporting Information for**  
**“Stability and strength of monolayer polymeric C<sub>60</sub>”**

Bo Peng<sup>1,\*</sup>

*<sup>1</sup>Theory of Condensed Matter Group, Cavendish Laboratory,  
University of Cambridge, J. J. Thomson Avenue,  
Cambridge CB3 0HE, United Kingdom*

(Dated: January 6, 2023)

## A. Computational details

Density functional theory calculations are performed using the Vienna *ab-initio* simulation package (VASP)<sup>1,2</sup>. The projector augmented wave (PAW) potential is used with C  $2s^22p^2$  valence states<sup>3,4</sup>, under the generalized gradient approximation (GGA) with the Perdew-Burke-Ernzerhof parameterization revised for solids (PBEsol) as the exchange-correlation functional<sup>5</sup>. For structural relaxation, a plane-wave cutoff of 800 eV is used with a  $\mathbf{k}$ -mesh of  $5 \times 5$  and  $3 \times 5$  for qTP and qHP  $C_{60}$  respectively, until the energy difference between successive steps is below  $10^{-6}$  eV and the forces on the atoms are below  $10^{-2}$  eV/Å. A vacuum spacing larger than 17 Å is used to eliminate interactions between neighboring unit cells along the  $c$  direction.

The elastic tensor coefficients (including ionic relaxations) are calculated using the finite differences method<sup>6,7</sup>, and then renormalized by the  $c$  lattice constant ( $C_{ij}^{2D} = c \times C_{ij}^{3D}$ )<sup>8,9</sup>.

The phonon spectra are calculated under the harmonic approximation based on density functional perturbation theory<sup>10-12</sup> using the PHONOPY code<sup>13,14</sup>. The supercell size is  $2 \times 2$  for qTP  $C_{60}$  with an electronic  $\mathbf{k}$ -point grid of ( $\Gamma$ -centered)  $2 \times 2$ , which is well converged, as shown in Fig. 1. The supercell size is  $1 \times 2$  for qHP  $C_{60}$  because the lattice constant  $a$  is nearly two times the  $b$ . The thermodynamic properties are calculated using a phonon  $\mathbf{q}$ -mesh of  $91 \times 91$  for both qTP and qHP  $C_{60}$  monolayers.

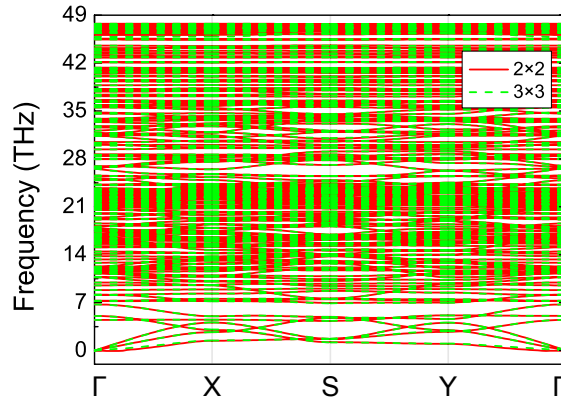

FIG. 1. Phonon spectra of qTP2  $C_{60}$  calculated from  $2 \times 2$  and  $3 \times 3$  supercells.

The role of thermal expansion is investigated under the quasi-harmonic approximation. The Helmholtz free energy is calculated for anisotropically contracted and expanded lattice with a strain step of 0.4%, and at least 25 configurations are included for each phase when

fitting the Gibbs free energy for a temperature step of 10 K between 0–900 K.

## B. Phonon group velocity

Figure 2 shows the calculated phonon group velocity  $v_g$  in 2D qTP2 and qHP  $C_{60}$ . The elastic constants can be estimated from the phonon speed of sound, i.e. phonon group velocity  $v_g$  near  $\Gamma$ <sup>15</sup>

$$C_{11} = \rho^{2D} \times (v_x^{LA})^2, \quad (1)$$

$$C_{22} = \rho^{2D} \times (v_y^{LA})^2, \quad (2)$$

$$C_{66} = \rho^{2D} \times (v_x^{TA})^2, \quad (3)$$

where  $\rho^{2D}$  is the mass density in 2D and  $v_{x/y}^{LA/TA}$  is the speed of sound for the longitudinal or transverse acoustic mode (LA/TA) along  $x/y$ . The computed elastic constants are listed in Table 2 in the main text.

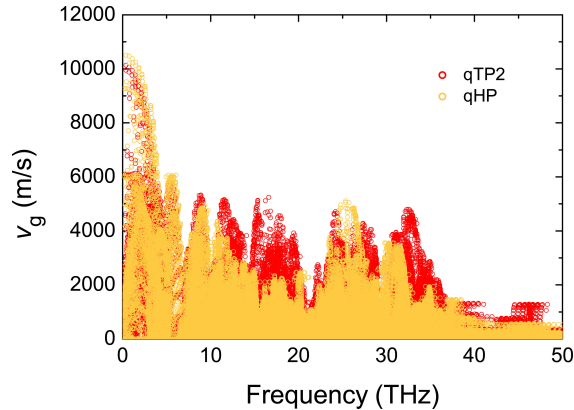

FIG. 2. Phonon group velocity in 2D qTP2 and qHP  $C_{60}$ .

## C. Phonon density of states and entropy

With increasing temperature, the free energy  $F$  of qTP1  $C_{60}$  drops faster than that of qTP2  $C_{60}$  due to their smaller vibrational frequencies. As shown in Fig. 3(a), the cumulative phonon density of states (phDOS) of qTP1 fullerene is much larger than that of qTP2 and qHP fullerene at frequencies below 7 THz. The low phonon frequencies in qTP1  $C_{60}$  give rise to higher entropy  $S$  in Fig. 3(b), especially at temperatures below 50 K. Consequently,

the Helmholtz free energy of qTP1  $C_{60}$  drops faster because of its higher entropy  $S$ , which gives the curve of the free energy  $F$  as a function of temperature  $T$ <sup>16,17</sup>

$$S = -\partial F/\partial T. \quad (4)$$

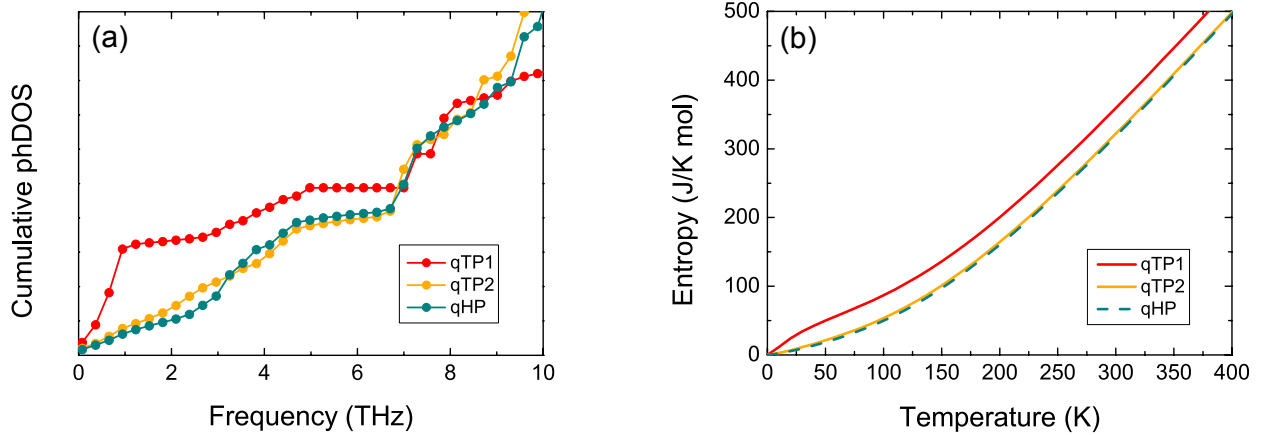

FIG. 3. (a) Cumulative phDOS and (b) phonon entropy of 2D qTP1, qTP2 and qHP  $C_{60}$ .

#### D. 1D qTP $C_{60}$ chains

For structural relaxation of 1D qTP  $C_{60}$  chains, a plane-wave cutoff of 800 eV is used with a  $\mathbf{k}$ -mesh of 5 along the chain direction, until the energy difference between successive steps is below  $10^{-6}$  eV and the forces on the atoms are below  $10^{-2}$  eV/Å. A vacuum spacing larger than 20 Å is used to eliminate interactions between neighboring unit cells along the interchain directions. The top view of the crystal structure of 1D qTP  $C_{60}$  chain is shown in Fig. 4(a). The strong covalent [2+2] bonds along  $a$  leads to high electron localization function (ELF) values. The band structures in Fig. 4(b) are calculated using screened hybrid functional HSE06<sup>18–20</sup>, with a direct band gap of 1.81 eV at the X high-symmetry point.

The interatomic force constants are calculated under the harmonic approximation based on density functional perturbation theory<sup>10–12</sup> using the PHONOPY code<sup>13,14</sup>, with a supercell of four qTP  $C_{60}$  molecules along the  $a$  direction. No imaginary mode is observed in Fig. 4(c), showing its dynamic stability. The extra zero-frequency mode at  $\Gamma$  other than the three acoustic modes is the typical torsional acoustic mode in 1D materials<sup>21,22</sup>. For thermal

expansion calculations, the Helmholtz free energy is calculated for 8 uniaxially contracted and expanded configurations with a strain step of 0.2% to fit the Gibbs free energy.

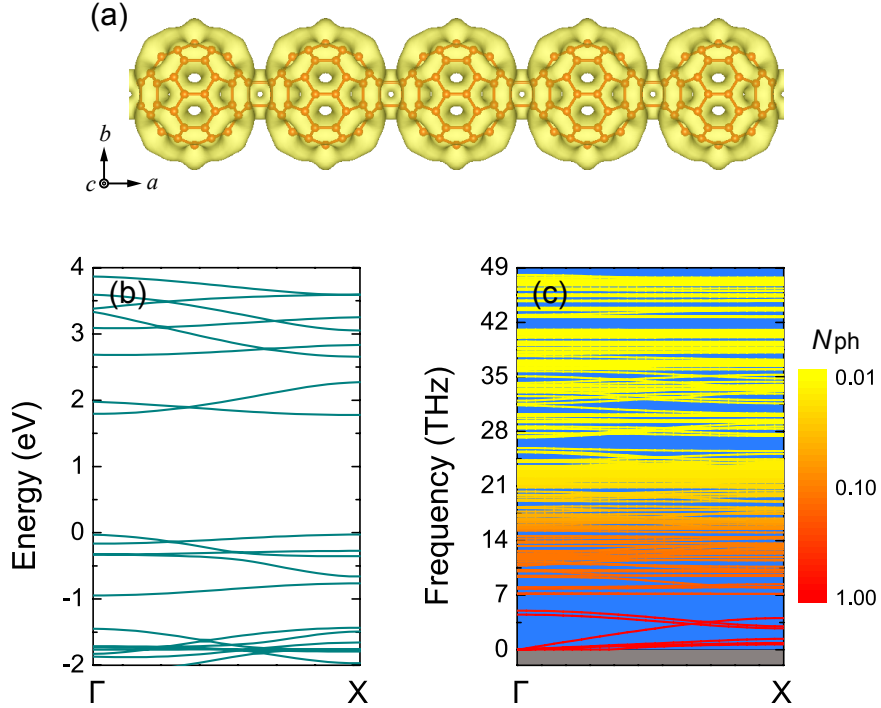

FIG. 4. (a) ELF of 1D qTP C<sub>60</sub> chain. The default isosurface level in VESTA<sup>23</sup> is used. (b) HSE06 band structures of 1D qTP C<sub>60</sub>. (c) Phonon dispersion of 1D qTP C<sub>60</sub> with the phonon occupation number  $N_{ph}$  determined from the Bose-Einstein distribution function at 300 K.

### E. Relative thermodynamic stability between 3D, 2D, 1D and 0D C<sub>60</sub>

For structural relaxation of bulk polymeric C<sub>60</sub>, a plane-wave cutoff of 800 eV is used with a  $\mathbf{k}$ -mesh of  $5 \times 5 \times 3$  and  $3 \times 5 \times 3$  for qTP and qHP C<sub>60</sub> respectively, until the energy difference between successive steps is below  $10^{-6}$  eV and the forces on the atoms are below  $10^{-2}$  eV/Å. The cohesive energy  $E_c$  for bulk single crystal polymeric C<sub>60</sub> is calculated and compared with their low-dimensional counterparts. As shown in Fig. 5, both 3D qTP1 and qHP C<sub>60</sub> are thermodynamically more stable than their 2D counterparts, whereas 3D qTP2 C<sub>60</sub> is energetically less favored than 2D qTP2 C<sub>60</sub>. Among all the bulk single crystal polymeric C<sub>60</sub>, 3D qTP1 C<sub>60</sub> has the lowest  $E_c$  while 3D qHP C<sub>60</sub> has the highest  $E_c$ .

To include the contribution of phonons, the Helmholtz free energy of 3D, 2D, 1D and 0D C<sub>60</sub> is calculated using the static lattice constants. The supercell size is  $2 \times 2 \times 1$  and

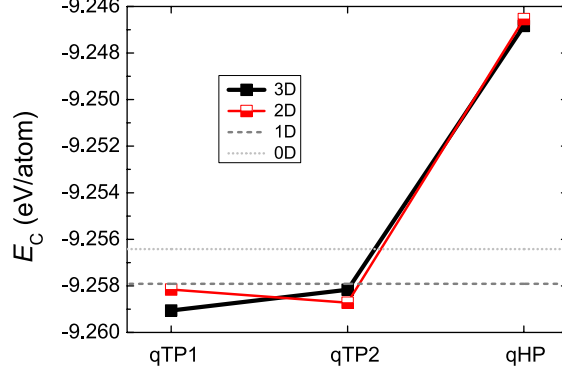

FIG. 5. Cohesive energy of bulk single crystal polymeric  $C_{60}$  and their low-dimensional counterparts.

$1 \times 2 \times 1$  for 3D qTP and qHP  $C_{60}$  respectively. Figure 6 shows the Helmholtz free energy of 3D, 2D and 1D qTP  $C_{60}$  as a function of temperature, with the free energy of monolayer qTP2  $C_{60}$  set to zero to compare the relative stability. Interestingly, bulk qTP1  $C_{60}$  has the lowest free energy in the entire temperature range (0 – 1000 K), whereas bulk qTP2  $C_{60}$  has the highest free energy above 50 K. It should be noted that, different from the Gibbs free energy in the main text that includes the contribution of thermal expansion, for all the structural phases in Fig. 6 thermal expansion is not included because the computational cost for thermal expansion in anisotropic bulk materials is much higher than that in their 2D counterparts.

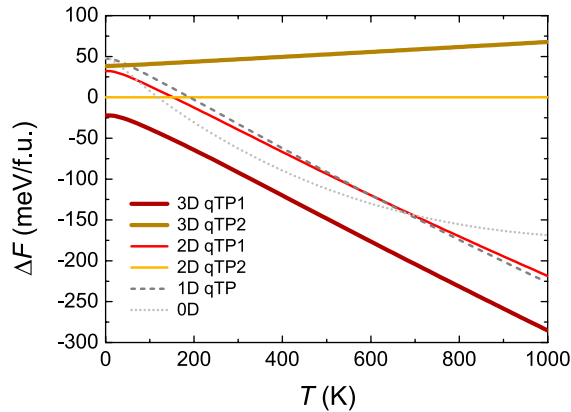

FIG. 6. Relative thermodynamic stability of bulk polymeric  $C_{60}$ , monolayer fullerene networks, one-dimensional fullerene chain and zero-dimensional fullerene molecule.

- 
- \* bp432@cam.ac.uk
- <sup>1</sup> G. Kresse and J. Furthmüller, “Efficient iterative schemes for *ab initio* total-energy calculations using a plane-wave basis set,” *Phys. Rev. B* **54**, 11169–11186 (1996).
  - <sup>2</sup> G. Kresse and J. Furthmüller, “Efficiency of *ab-initio* total energy calculations for metals and semiconductors using a plane-wave basis set,” *Computational Materials Science* **6**, 15 – 50 (1996).
  - <sup>3</sup> P. E. Blöchl, “Projector augmented-wave method,” *Phys. Rev. B* **50**, 17953–17979 (1994).
  - <sup>4</sup> G. Kresse and D. Joubert, “From ultrasoft pseudopotentials to the projector augmented-wave method,” *Phys. Rev. B* **59**, 1758–1775 (1999).
  - <sup>5</sup> John P. Perdew, Adrienn Ruzsinszky, Gábor I. Csonka, Oleg A. Vydrov, Gustavo E. Scuseria, Lucian A. Constantin, Xiaolan Zhou, and Kieron Burke, “Restoring the Density-Gradient Expansion for Exchange in Solids and Surfaces,” *Phys. Rev. Lett.* **100**, 136406 (2008).
  - <sup>6</sup> Yvon Le Page and Paul Saxe, “Symmetry-general least-squares extraction of elastic data for strained materials from *ab initio* calculations of stress,” *Phys. Rev. B* **65**, 104104 (2002).
  - <sup>7</sup> Xifan Wu, David Vanderbilt, and D. R. Hamann, “Systematic treatment of displacements, strains, and electric fields in density-functional perturbation theory,” *Phys. Rev. B* **72**, 035105 (2005).
  - <sup>8</sup> Michael N. Blonsky, Houlong L. Zhuang, Arunima K. Singh, and Richard G. Hennig, “Ab initio prediction of piezoelectricity in two-dimensional materials,” *ACS Nano* **9**, 9885–9891 (2015).
  - <sup>9</sup> Bo Peng, Hao Zhang, Hezhu Shao, Zeyu Ning, Yuanfeng Xu, Gang Ni, Hongliang Lu, David Wei Zhang, and Heyuan Zhu, “Stability and strength of atomically thin borophene from first principles calculations,” *Materials Research Letters* **5**, 399–407 (2017).
  - <sup>10</sup> Stefano Baroni, Stefano de Gironcoli, Andrea Dal Corso, and Paolo Giannozzi, “Phonons and related crystal properties from density-functional perturbation theory,” *Rev. Mod. Phys.* **73**, 515–562 (2001).
  - <sup>11</sup> Xavier Gonze, “Perturbation expansion of variational principles at arbitrary order,” *Phys. Rev. A* **52**, 1086–1095 (1995).
  - <sup>12</sup> Xavier Gonze, “Adiabatic density-functional perturbation theory,” *Phys. Rev. A* **52**, 1096–1114 (1995).

- <sup>13</sup> Atsushi Togo, Fumiyasu Oba, and Isao Tanaka, “First-principles calculations of the ferroelastic transition between rutile-type and  $\text{CaCl}_2$ -type  $\text{SiO}_2$  at high pressures,” *Phys. Rev. B* **78**, 134106 (2008).
- <sup>14</sup> Atsushi Togo and Isao Tanaka, “First principles phonon calculations in materials science,” *Scripta Materialia* **108**, 1–5 (2015).
- <sup>15</sup> Jing Feng, Bing Xiao, Rong Zhou, Wei Pan, and David R. Clarke, “Anisotropic elastic and thermal properties of the double perovskite slab-rock salt layer  $\text{Ln}_2\text{SrAl}_2\text{O}_7$  ( $\text{Ln} = \text{La}, \text{Nd}, \text{Sm}, \text{Eu}, \text{Gd}$  or  $\text{Dy}$ ) natural superlattice structure,” *Acta Materialia* **60**, 3380–3392 (2012).
- <sup>16</sup> Martin T. Dove, *Introduction to Lattice Dynamics* (Cambridge University Press, 1993).
- <sup>17</sup> Pasquale Pavone, Stefano Baroni, and Stefano de Gironcoli, “ $\alpha \leftrightarrow \beta$  phase transition in tin: A theoretical study based on density-functional perturbation theory,” *Phys. Rev. B* **57**, 10421–10423 (1998).
- <sup>18</sup> Jochen Heyd, Gustavo E. Scuseria, and Matthias Ernzerhof, “Hybrid functionals based on a screened Coulomb potential,” *J. Chem. Phys.* **118**, 8207 (2003).
- <sup>19</sup> Jochen Heyd, Gustavo E. Scuseria, and Matthias Ernzerhof, “Erratum: ‘Hybrid functionals based on a screened Coulomb potential’ [*J. Chem. Phys.*118, 8207 (2003)],” *J. Chem. Phys.* **124**, 219906 (2006).
- <sup>20</sup> Juan E. Peralta, Jochen Heyd, Gustavo E. Scuseria, and Richard L. Martin, “Spin-orbit splittings and energy band gaps calculated with the Heyd-Scuseria-Ernzerhof screened hybrid functional,” *Phys. Rev. B* **74**, 073101 (2006).
- <sup>21</sup> Bo Peng, Ke Xu, Hao Zhang, Zeyu Ning, Hezhu Shao, Gang Ni, Jing Li, Yongyuan Zhu, Heyuan Zhu, and Costas M. Soukoulis, “1D  $\text{SbSeI}$ ,  $\text{SbSI}$ , and  $\text{SbSBr}$  With High Stability and Novel Properties for Microelectronic, Optoelectronic, and Thermoelectric Applications,” *Adv. Theory Simul.* **1**, 1700005 (2018).
- <sup>22</sup> Gunnar F. Lange, Adrien Bouhon, Bartomeu Monserrat, and Robert-Jan Slager, “Topological continuum charges of acoustic phonons in two dimensions and the nambu-goldstone theorem,” *Phys. Rev. B* **105**, 064301 (2022).
- <sup>23</sup> Koichi Momma and Fujio Izumi, “Vesta 3 for three-dimensional visualization of crystal, volumetric and morphology data,” *Journal of Applied Crystallography* **44**, 1272–1276 (2011).
